# Supplementary material for: Dual-mode frequency multiplier in graphene-base hot electron transistor
Source: Royal Society of Chemistry journal article supplement (doi:10.1039/d2nr06285b), 2023-01-01
Supplement: d2nr06285b1.pdf [file d2nr06285b1.pdf]

# 1 Supporting Information

## 2 Dual-Mode Frequency Multiplier in Graphene-Base 3 Hot Electron Transistor

4  
5 **Bor-Wei Liang<sup>1</sup>, Min-Fang Li<sup>1</sup>, Hung-Yu Lin<sup>1</sup>, Kai-Shin Li<sup>2</sup>, Jyun-Hong Chen<sup>2</sup>, Jia-Min Shieh<sup>2</sup>,**  
6 **Chien-Ting Wu<sup>2</sup>, Kristan Bryan Simbulan<sup>3</sup>, Ching-Yuan Su<sup>4</sup>,**  
7 **Chieh-Hsiung Kuan<sup>1</sup> and Yann-Wen Lan<sup>4,5\*</sup>**

8  
9 *<sup>1</sup>Graduate Institute of Electronics Engineering, National Taiwan University, Taipei 10617, Taiwan*

10 *<sup>2</sup>Taiwan Semiconductor Research Institute, National Applied Research Laboratories, Hsinchu 30078, Taiwan*

11 *<sup>3</sup>Department of Mathematics and Physics, University of Santo Tomas, Manila 1008, Philippines*

12 *<sup>4</sup>Graduate Institute of Energy Engineering, National Central University, No. 300, Zhongda Rd., Zhongli, Taoyuan,*  
13 *320317, Taiwan*

14 *<sup>5</sup>Department of Physics, National Taiwan Normal University, Taipei 11677, Taiwan*

15 *<sup>6</sup>Advanced Materials and Green Energy Research Center, National Taiwan Normal University, Taipei 11677,*  
16 *Taiwan*

17 *\*Corresponding Author e-mail address: [ywlanblue@gmail.com](mailto:ywlanblue@gmail.com)*

18  
19 **KEYWORDS:** Dual-mode, Frequency multiplier, quantum tunneling, graphene transistor,  
20 2D materials, frequency doubler

21

# 1. Raman spectra for graphene / MoS<sub>2</sub> / h-BN stacking

2

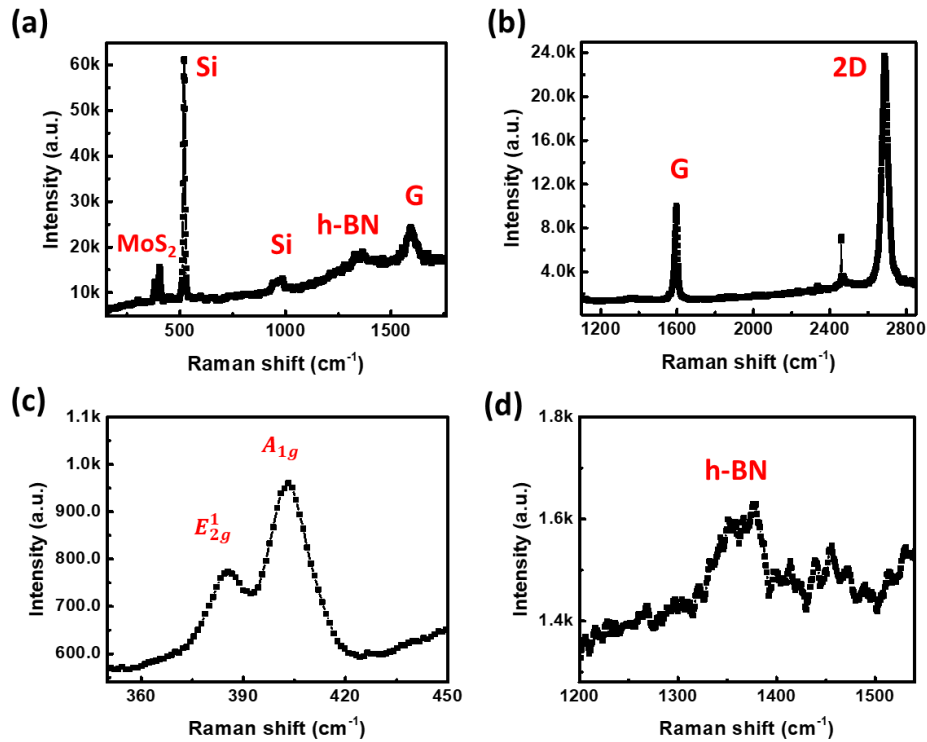

3

4 **Figure S1.** Raman spectra of the cross-section of our GHET for (a) all range spectrum, (b)  
5 graphene, (c) MoS<sub>2</sub>, and (d) h-BN.

6

7 The Raman spectroscopic characterizations cross-section of the GHET and the peaks of the  
8 graphene, MoS<sub>2</sub>, and hBN layers, which are used in these devices, are shown in **Figure S1**. **Figure**  
9 **S1a** reveals the MoS<sub>2</sub>, Si, hBN, and graphene characteristic Raman peaks. **Figure S1b** presents  
10 the graphene Raman spectrum. The ratio between the G and 2D peaks (about 1:2) with a weak  
11 defect peak indicates a good quality monolayer graphene <sup>1</sup>. In **Figure S1c**, the peak separation of  
12 Raman peaks A<sub>1g</sub> and E<sup>1</sup><sub>2g</sub> is around 20.5 cm<sup>-1</sup> indicating the presence of a monolayer CVD-MoS<sub>2</sub><sup>2</sup>.  
13 **Figure 2d** shows the characteristic Raman peak of hBN (1367cm<sup>-1</sup>).<sup>3</sup>

14

1 **2. Two-terminal transport characteristics for temperature-dependent**  
 2 **measurement**

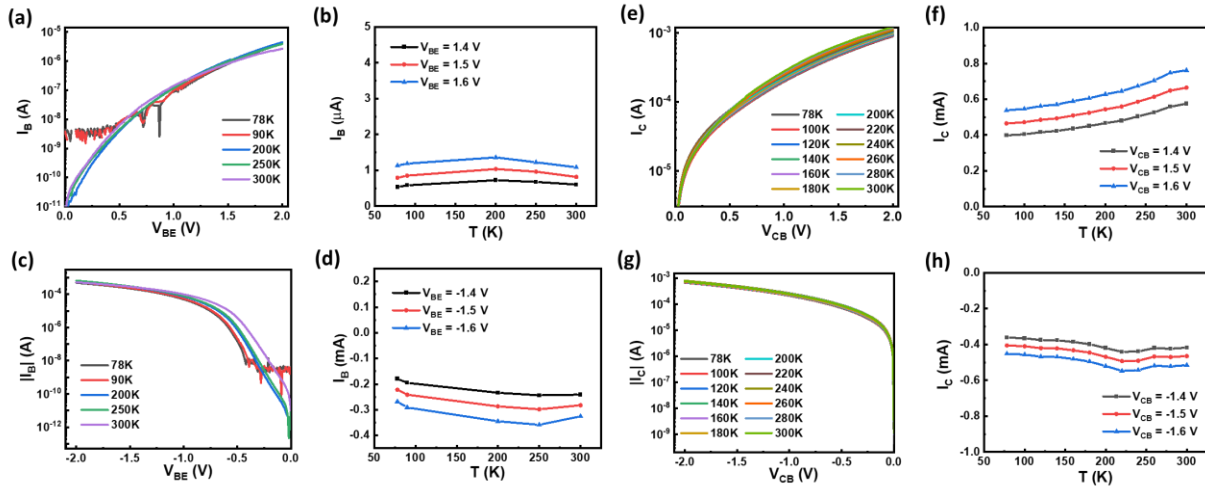

3  
 4 **Figure S2.** (a) The current-voltage ( $I_B - V_{BE}$ ) characteristics of the device using a two-terminal  
 5 measurement technique under different temperatures, where  $V_{BE}$  is larger than 0 V, (b)  $I_B - T$  at  
 6 fixed bias  $V_{BE}$ . (c)  $I_B - V_{BE}$  under different temperatures, where  $V_{BE} < 0$  V, (d)  $I_B - T$  at fixed bias  
 7  $V_{BE}$ . (e) The current-voltage ( $I_C - V_{CE}$ ) characteristics via two-terminal measurement under  
 8 different temperatures where  $V_{CE}$  is larger than 0 V, (f)  $I_C - T$  at fixed bias  $V_{CE}$ . (g)  $I_C - V_{CB}$  under  
 9 different temperatures, where  $V_{BE} < 0$  V, (h)  $I_C - T$  at fixed bias  $V_{CB}$ .

10  
 11 **Figure S2** demonstrates the two-terminal measurement I-V curve from  $T = 300$  K to  $T = 78$   
 12 K. **Figure S2a** shows the  $I_B - V_{BE}$  curve at  $V_{BE} > 0$  V, **Figure S2b** shows the corresponding  $I_B - T$   
 13 curve at certain fixed values of  $V_{BE}$ , while **Figure S2c** and **Figure S2d** show the same  
 14 measurement method for  $V_{BE} < 0$  V. These results demonstrate almost constant current levels at  
 15 different temperatures at certain fixed  $V_{BE}$  and confirm the tunneling mechanism. Similar results  
 16 are also shown in **Figure S2e-S2h** for the C-B terminal. Therefore, we have observed that the  
 17 tunneling mechanism dominates the carrier transport at high applied bias in the B-E and C-B  
 18 terminals.

19

1 **3. Experimental and fitted I-V characteristics of device's emitter-base and**  
 2 **collector-base terminals**

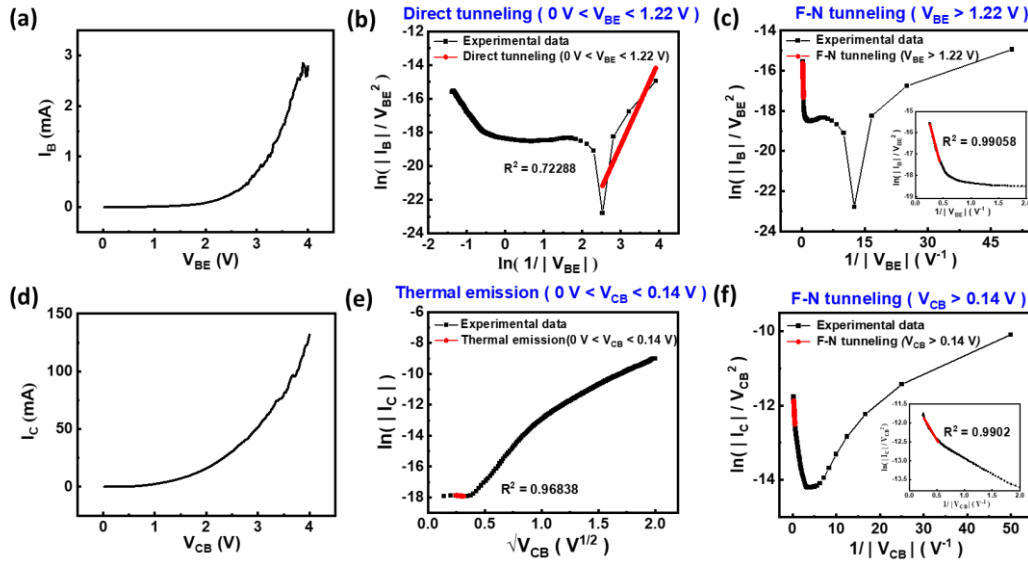

3  
 4 **Figure S3.** (a)  $I_B - V_{BE}$  for  $V_{BE} > 0$  V. (b) Direct tunneling fitting of (a) for  $0$  V  $< V_{BE} < 1.22$  V.  
 5 (c) F-N tunneling fitting of (a) for  $V_{BE} > 1.22$  V. (d)  $I_C - V_{CB}$  for  $V_{CB} > 0$  V. (e) Thermionic emission  
 6 fitting of (b) for  $0$  V  $< V_{CB} < 0.14$  V. (f) F-N tunneling fitting of (b) for  $V_{CB} > 0.14$  V.

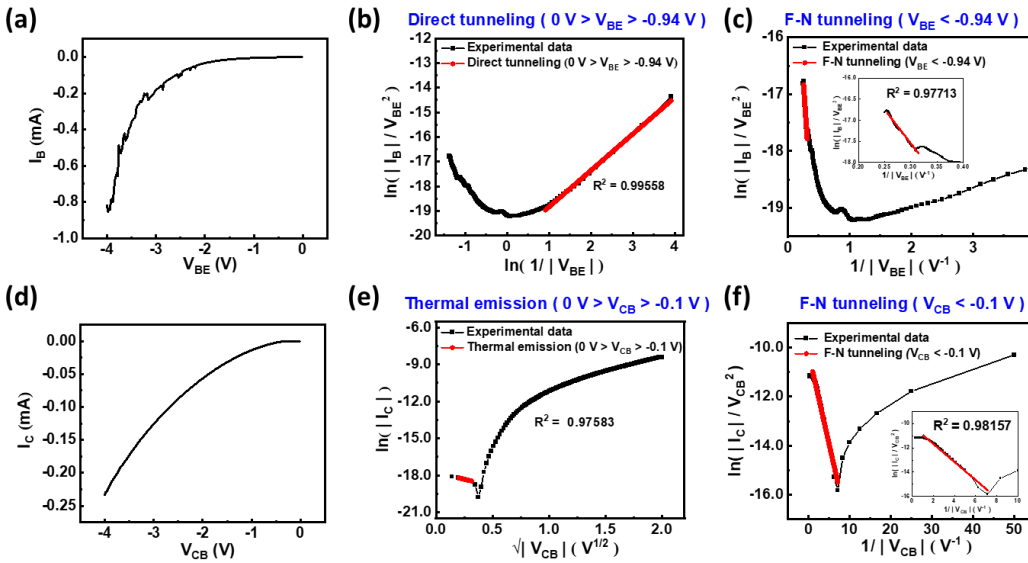

7  
 8 **Figure S4.** (a)  $I_B - V_{BE}$  for  $V_{BE} < 0$  V. (b) Direct tunneling fitting of (a) for  $-0.94$  V  $< V_{BE} < 0$  V. (c)  
 9 F-N tunneling fitting of (a) for  $V_{BE} < -0.94$  V. (d)  $I_C - V_{CB}$  for  $V_{CB} < 0$  V. (e) Thermionic emission  
 10 fitting of (b) for  $-0.1$  V  $< V_{CB} < 0$  V. (f) F-N tunneling fitting of (b) for  $V_{CB} < -0.1$  V.

1 Two-terminal current-voltage characteristics involving both the B-E and the B-C barriers at  
2 positive applied bias are shown in **Figure S3**. **Figure S3a** provides the current-voltage (I-V)  
3 characteristics measurement for the base current (i.e., emitter current) as a function of applied  $V_{BE}$ .  
4 The onset voltage  $V_{on}$  is about 1.22 V, and the current value is about a few micro-amperes. As  
5 implied in the band diagrams (**Figure 2** in the main text), quantum tunneling is the dominating  
6 carrier transport mechanism. Energy barriers for both  $SiO_2$  (EB barrier) can be bent between the  
7 on-state and the off-state of the two terminals. Carrier transport through a barrier below the onset  
8 voltage can arise from several mechanisms such as Direct Tunneling or Thermal Emission) while  
9 Fowler–Nordheim (FN) tunneling is applied above the onset voltage. Figure S3b and **Figure S3c**  
10 show the fitting curve of the Direct tunneling (off-state) mechanism and FN tunneling (on-state).  
11 For the B-E terminal, the I-V relationship curve can be linearly fitted for the Direct tunneling  
12 mechanism (off-state) through the  $\ln(I/V^2)$  versus  $\ln(V^{-1})$  plot at  $V_{BE} < 1.22$  V (**Figure S3b**).

13 The I-V relationship curve of the F-N tunneling (on-state) mechanism can also be analyzed  
14 on an  $\ln(I)$  versus  $V^{-1}$  plot at  $V_{BE} > 1.22$  V (**Figure S3c**).<sup>4, 5</sup> A good fit is achieved at higher  $V_{BE}$ ,  
15 which confirms that the dominant transport mechanism is FN tunneling. Similar characteristics  
16 were revealed across the CB terminals, as shown in **Figure S3d -S3f**. The I-V relationship curve  
17 of the thermal emission (off-state) mechanism can be linearly fit on an  $\ln(I)$  versus  $\ln(V^{1/2})$  plot at  
18  $V_{CB} < 0.14$  V (**Figure S3e**). And the I-V relationship curve of the F-N tunneling (on-state)  
19 mechanism can also be studied on an  $\ln(I)$  versus  $V^{-1}$  plot at  $V_{CB} > 0.14$  V (**Figure S3f**). A similar  
20 result can also be performed in the negative applied base in GHET, as shown in **Figure S4**.

21

## 1 4. The DC measurement result of GHET

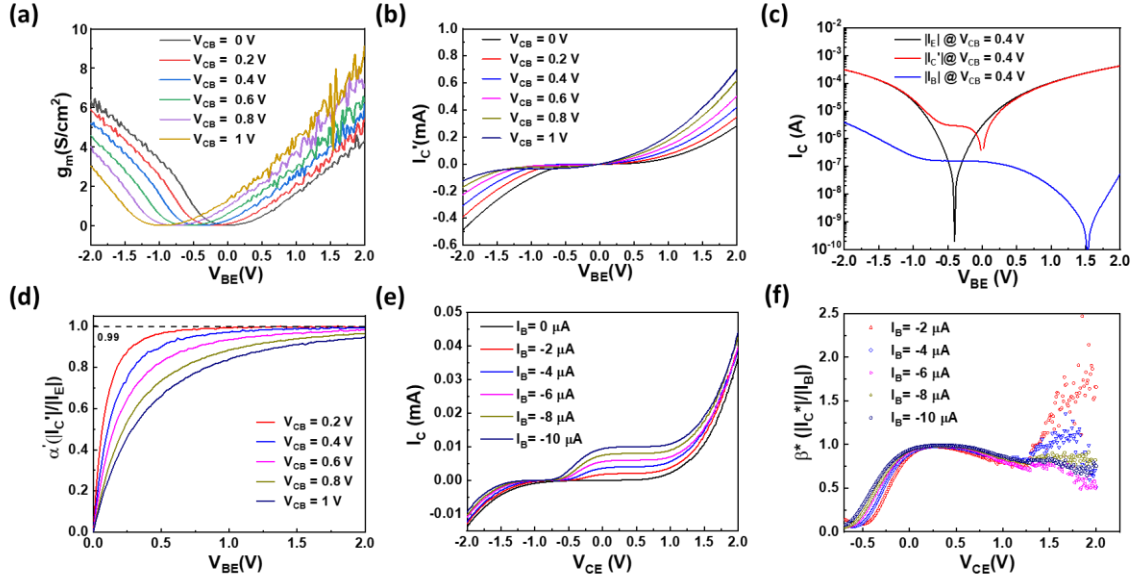

2

3 **Figure S5 (a)** The transconductance ( $g_m$ ) and **(b)**  $I_C'$  with applied  $V_{CB}$ , via common-base  
 4 measurement and **(c)**  $I$ - $V_{CB}$  curves comparing the  $I_E$ ,  $I_C'$  and  $I_B$  at  $V_{CB} = 0.4$  V. **(d)** Common-base  
 5 current gain ( $\alpha^*$ ) as a function of  $V_{BE}$  at various  $V_{CB}$  levels Common-emitter characteristics for **(e)**  
 6  $I_C$  and **(f)** current gain ( $\beta^*$ ) tuned by  $V_{CE}$  at varying input base current ( $I_B$ ).

7 The basic characteristic of GHET is shown in **Figure S5**. **Figure S5a** shows the  
 8 transconductance ( $g_m$ ), which is a noticeable increase at larger  $V_{BE}$ . This result indicates that the  
 9 base-emitter and collector-base barriers are bent by applied  $V_{BE}$  so that the electron can tunnel  
 10 through GHET devices. In order to extract the leakage current from the base to the collector, the  
 11 corrected collector current ( $I_C'$ ) is defined as the difference between the original collector current  
 12 ( $I_C(V_{BE} \neq 0)$ ) and the collector current ( $I_C(V_{BE} = 0)$ ) with no  $V_{BE}$  applied bias. **Figure S5b** shows  
 13 the  $I_C'$ - $V_{BE}$  characteristic curves with different values of  $V_{CB}$  applied. The electrical characteristic  
 14 is similar to the  $I_C$ - $V_{BE}$  (**Figure 2d**) within the on-state condition (Region I and Region III). **Figure**  
 15 **S5c** shows the  $I$ - $V_{CB}$  curves comparing the  $I_E$ ,  $I_C'$  and  $I_B$  at  $V_{CB} = 0.4$  V. The value of  $I_B$  is more  
 16 than 2 orders smaller than the output current  $I_C'$ , which indicates the small leakage current from  
 17 base to collector.

18 One of the figures of merits for GHET is its common base current gain,  $\alpha = |I_C|/|I_E|$ . In our  
 19 case, the common base current gain is defined as  $\alpha' = |I_C'|/|I_E|$  to remove the concern of leakage

1 current. **Figure S5d** shows that the  $\alpha'$  gets closer to 0.992 and maintains a certain value at an  
2 applied bias greater than  $V_{BE} = 1.25$  V, which is similar to the onset voltage of  $V_{BE}$  terminal (see  
3 **Figure S3c**).

4 The amplifier characteristics of the GHET under the common-emitter configuration can also  
5 be revealed. **Figure S5e** and **Figure S5f** show the  $I_C$ - $V_{CE}$  curves and corresponding common base  
6 current gain ( $\beta^*$ ) =  $|I_C^*|/|I_B|$ , respectively. Here, the  $I_C^*$  is also defined as the difference between  
7 the original collector current ( $I_C(I_B \neq 0)$ ) and the collector current at zero input current ( $I_C(I_B =$   
8  $0)$ ) in order to extract the leakage current from the emitter to the collector. The maximum value of  
9  $\beta^*$  is around 1.8 at  $V_{CE} = 2$  V and  $I_B = -2$   $\mu$ A.

10 We also estimate the cut-off frequency by the RC time constant as the equation below.

11 
$$f_T = \frac{g_m}{2\pi C}$$

12 where  $f_T$  is the cut-off frequency of GHET,  $g_m$  is the transconductance per area of GHET (about  
13  $\sim 8$  S/cm<sup>2</sup>, see **Figure S5a**).  $C$  denotes the net capacitance per area of the 1.7 nm SiO<sub>2</sub> and 4 nm  
14 hBN in series. The capacitance is given by  $\epsilon/d$ .  $d$  is the thickness of dielectric materials. The  
15 dielectric constant ( $\epsilon$ ) for hBN and SiO<sub>2</sub> is 3.29 and 3.9, respectively.<sup>6,7</sup> The calculated  $f_T$  is about  
16 5 MHz. This result shows that the device can only be applied to around MHz range in these specific  
17 devices.

18

1 **5. The IV characteristic of GHET operated at  $V_{BE} > 0$  and  $V_{CB} < 0$**

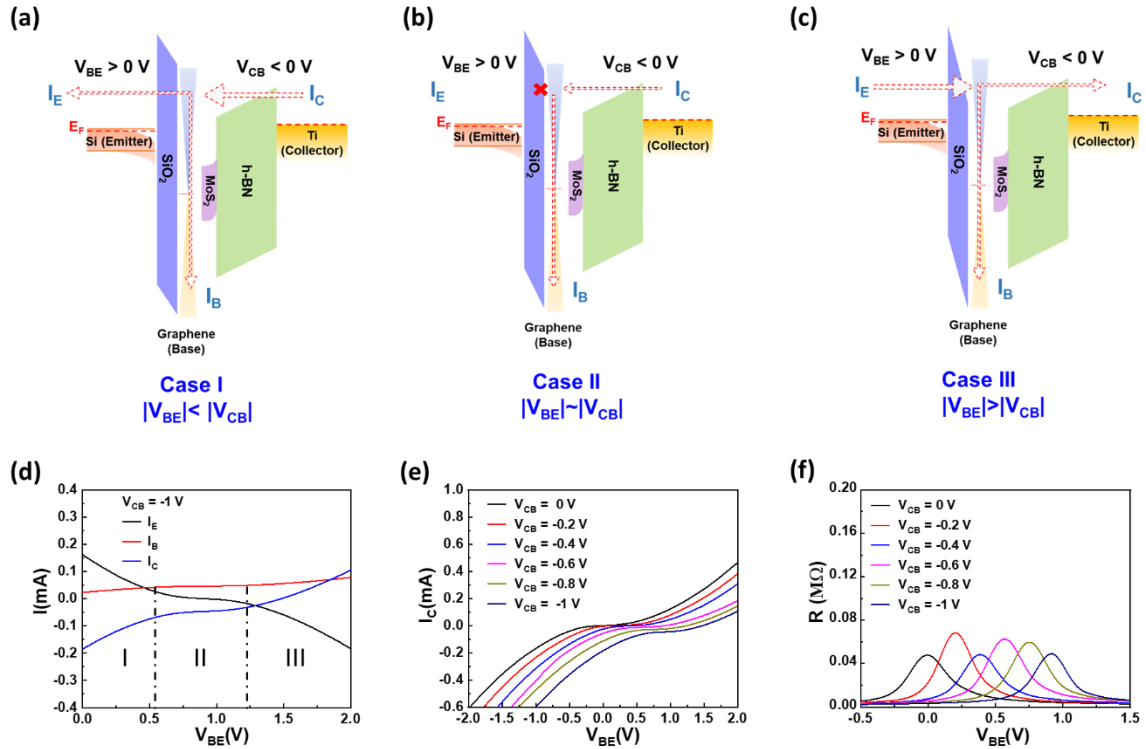

2  
3 **Figure S6** Energy band diagrams for  $V_{BE} > 0$  and  $V_{CB} < 0$ . (a) Case I:  $|V_{BE}| < |V_{CB}|$  (b) Case II:  
4  $|V_{BE}| \sim |V_{CB}|$  (c) Case III:  $|V_{BE}| > |V_{CB}|$  (d) I- $V_{BE}$  curves comparing the  $I_E$ ,  $I_B$ , and  $I_C$  at fixed  $V_{CB}$   
5 = -1 V under common-base operation. (e)  $I_C$ - $V_{BE}$  curves at various values of negative  $V_{CB}$ . (f) R-  
6  $V_{BE}$  curves controlled by various values of  $V_{CB}$ .

7 The electrical characteristics of GHET at negative  $V_{BC}$  applied are discussed in **Figure S6**.  
8 **Figure S6a-S6c** are the energy band diagrams at  $V_{BE} > 0$  and  $V_{CB} < 0$  for case I:  $|V_{BE}| < |V_{CB}|$ ,  
9 case II:  $|V_{BE}| \sim |V_{CB}|$ , case III:  $|V_{BE}| > |V_{CB}|$  conditions. The corresponding I- $V_{BE}$  curves are  
10 demonstrated in **Figure S6d**. For case I ( $|V_{BE}| < |V_{CB}|$ ), the hot carriers gain enough kinetic energy  
11 from the collector, passing through the collector-base barrier (hBN) and finally entering the base  
12 region. The native  $\text{SiO}_2$  with applied positive  $V_{BE}$  creates a higher barrier to block some cold  
13 electrons from the graphene base and then forms the positive  $I_B$ . On the other hand, electrons with  
14 enough kinetic energy can tunnel through the emitter-base barrier and generate current  $I_C$ . If we  
15 increase  $V_{BE}$  further (Case II:  $|V_{BE}| \sim |V_{CB}|$ ), the emitter-base tunneling barrier can block most of  
16 the electrons from base to emitter. Therefore, the value of  $I_E$  is close to 0. As the  $V_{BE}$  gets larger  
17 (Case III:  $|V_{BE}| > |V_{CB}|$ ), the directions of  $I_C$  and  $I_E$  electrons are opposite to case I. The hot electrons



1 can pass through the GHET from the emitter to the collector. On the other hand, the cold electrons  
2 are blocked by the collector base barrier (MoS<sub>2</sub>/hBN) forming positive current I<sub>B</sub>. I<sub>C</sub>-V<sub>BE</sub> curves  
3 at various negative V<sub>CB</sub> and the corresponding R-V<sub>BE</sub> curves are shown in **Figure S6e** and **Figure**  
4 **S6f**, respectively. According to these two figures, it can be found that the R peaks happen at Case  
5 II(|V<sub>BE</sub>| ~ |V<sub>CB</sub>|) bias condition. Therefore, when a higher negative value of V<sub>CB</sub> is applied, the R  
6 peak position will shift to a higher V<sub>BE</sub> region.

7

1 **7. The reproducible behavior of  $P_{out, 3f} / P_{out, 2f}$  contour plot in another device**

2

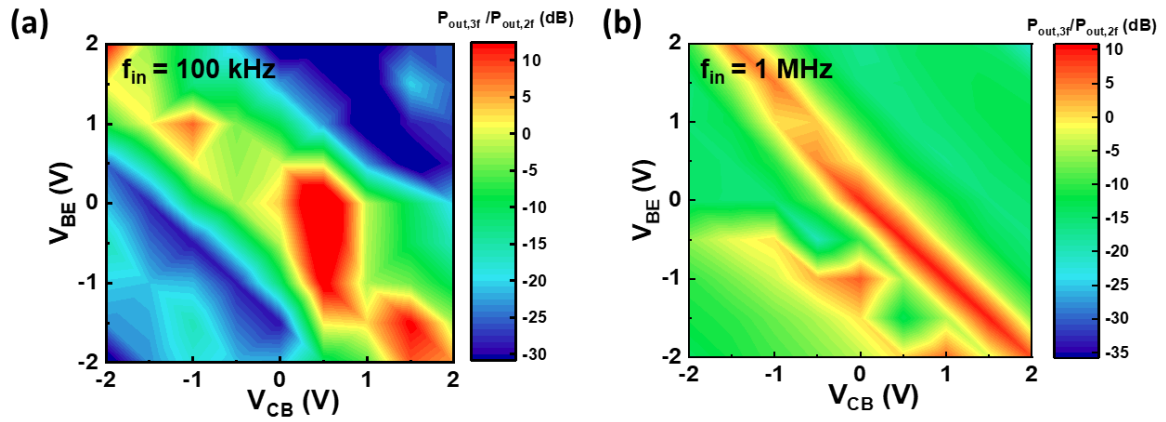

3

4 **Figure S7.** The contour plot of  $P_{out, 3f} / P_{out, 2f}$  under different values of applied bias given an (a)  
5  $f_{in} = 100$  kHz and (b)  $f_{in} = 1$  MHz in another device.

6

7 We have fabricated many GHET devices with different collector areas. The results are  
8 repeatable and reproducible. The  $P_{out, 3f} / P_{out, 2f}$  contour plot of one of them is shown in **Figure S5**,  
9 in which the collector area is about  $5 \times 10^{-6}$  cm<sup>2</sup>.

10

## 8. The limitation of operation frequency of the GHET

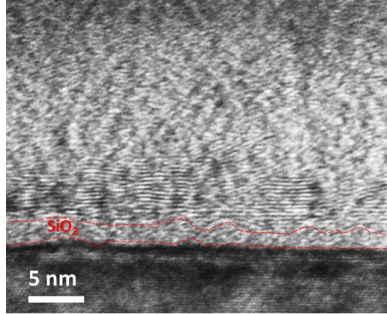

**Figure S8.** (a) TEM image showing the native SiO<sub>2</sub> thickness of the GHET. The thickness varies from 0.9 nm to 1.8 nm.

The operation frequency limitation is probably due to the native silicon dioxide thickness. We consider the FN tunneling model (shown below)<sup>8</sup> to estimate the transconductance ( $g_m$ ) and the corresponding cut-off frequency of this kind of GHET design.

$$I(V) = \frac{A_{eff} m q^3 V^2}{8\pi h \phi_B d^2 m^*} \exp\left(\frac{-8\pi \sqrt{2m^*} \phi_B^{\frac{3}{2}} d}{3hqV}\right)$$

where  $q$ ,  $m$ ,  $m^*$ ,  $h$ ,  $d$ ,  $A_{eff}$ ,  $\phi_B$ , and  $V$  are elementary charge, electron mass, effective mass ( $0.42 \times m$  for SiO<sub>2</sub>)<sup>9</sup>, Planck's constant, SiO<sub>2</sub> thickness, effective area of devices ( $7.85 \times 10^{-5} \text{ cm}^2$ ), barrier height ( $\sim 2.96 \text{ eV}$ )<sup>10</sup> and the applied bias. **Figure S8** shows the TEM image of the native SiO<sub>2</sub> thickness for the GHET. The SiO<sub>2</sub> thickness varies from 0.9 nm to 1.8 nm due to the variation of growing native silicon dioxide. If the SiO<sub>2</sub> thickness ( $d$ ) is determined to be 0.9 nm and  $V$  is 2 V, the calculated current density ( $J = I/A_{eff}$ ) is about  $2.42 \times 10^4 \text{ A/cm}^2$ , and transconductance  $g_m$  is around  $10^5 \text{ S/cm}^2$ . The calculated  $f_T (= g_m/(2\pi C))$  is about tens of GHz.  $C$  denotes the net capacitance per area of the 0.9 nm SiO<sub>2</sub> capacitance and 4 nm hBN capacitance in series. This result means that by the device design (see **Figure 1a**), the maximum operation frequency of the GHET can reach GHz. However, the roughness of native silicon dioxide thickness makes the GHET cannot operate in such high frequency. For example, if the SiO<sub>2</sub> thickness is increased to 1.7 nm,  $g_m$  could dramatically decrease to  $6.9 \text{ S/cm}^2$ , and the cut-off frequency is only about a few MHz. That is the potential reason our specific devices can only operate in the MHz range owing to uncontrollable SiO<sub>2</sub> thickness variation. This result reveals that operation frequency limitation

1 is due to uncontrollable thickness of native SiO<sub>2</sub>, which is our device's emitter base tunneling  
2 barrier. The high-quality 2D materials insulator, like one-layer hBN with sub-one-nanometer  
3 thickness, would be one of the effective candidates for substitution for native SiO<sub>2</sub> to increase the  
4 operation frequency of the GHET.

5

## 6 **References**

- 7 1. A. C. Ferrari and D. M. Basko, *Nature Nanotechnology*, 2013, **8**, 235-246.
- 8 2. H. Kwon, S. Garg, J. H. Park, Y. Jeong, S. Yu, S. M. Kim, P. Kung and S. Im, *npj 2D*  
9 *Materials and Applications*, 2019, **3**, 9.
- 10 3. Y. Kubota, K. Watanabe, O. Tsuda and T. Taniguchi, *Science*, 2007, **317**, 932-934.
- 11 4. B. K. Sarker and S. I. Khondaker, *ACS nano*, 2012, **6**, 4993-4999.
- 12 5. J. M. Beebe, B. Kim, J. W. Gadzuk, C. D. Frisbie and J. G. Kushmerick, *Physical review*  
13 *letters*, 2006, **97**, 026801.
- 14 6. A. Laturia, M. Van de Put and W. Vandenberghe, *npj 2D Materials and Applications*,  
15 2018, **2**.
- 16 7. J. Robertson, *The European Physical Journal-Applied Physics*, 2004, **28**, 265-291.
- 17 8. G.-H. Lee, Y.-J. Yu, C. Lee, C. Dean, K. L. Shepard, P. Kim and J. Hone, *Applied physics*  
18 *letters*, 2011, **99**, 243114.
- 19 9. B. Brar, G. Wilk and A. J. A. p. I. Seabaugh, 1996, **69**, 2728-2730.
- 20 10. Y. Liu, J. Sheng, H. Wu, Q. He, H. C. Cheng, M. I. Shakir, Y. Huang and X. Duan,  
21 *Advanced Materials*, 2016, **28**, 4120-4125.

22
